# Supplementary material for: A curated collection of Klebsiella metabolic models reveals variable substrate usage and gene essentiality
Source: bioRxiv or medRxiv preprint supplement (doi:10.1101/2021.10.10.463858), 2021-10-11
Supplement: Supplementary file [file media-1.pdf]

**3-(3-hydroxy-phenyl)propionate**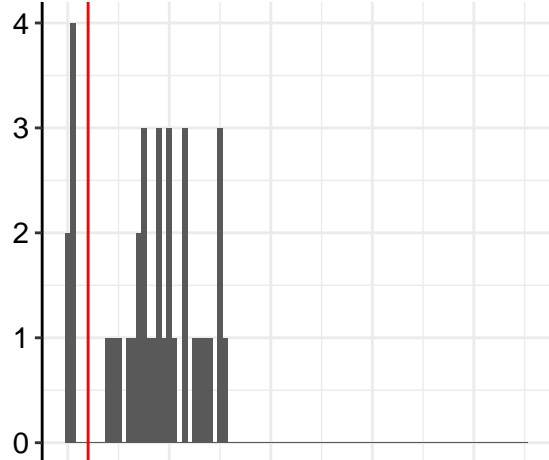**3-hydroxycinnamic acid**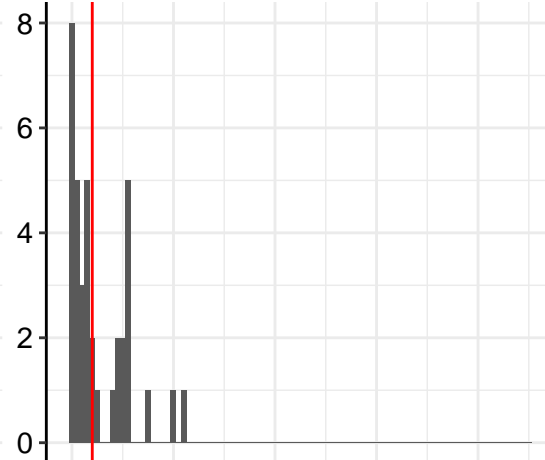**gamma-aminobutyric acid**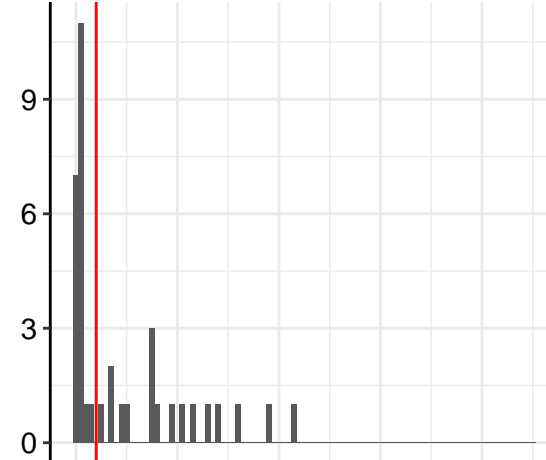**L-sorbose**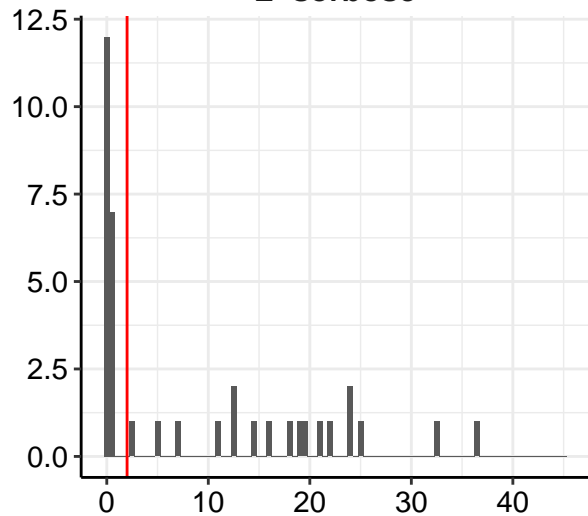**D-galactarate**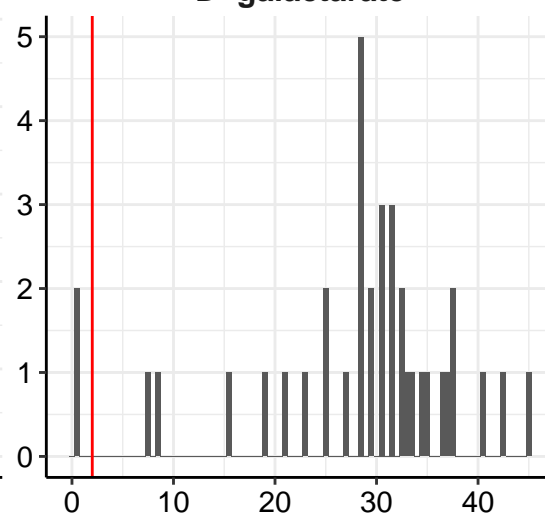**tricarballylate**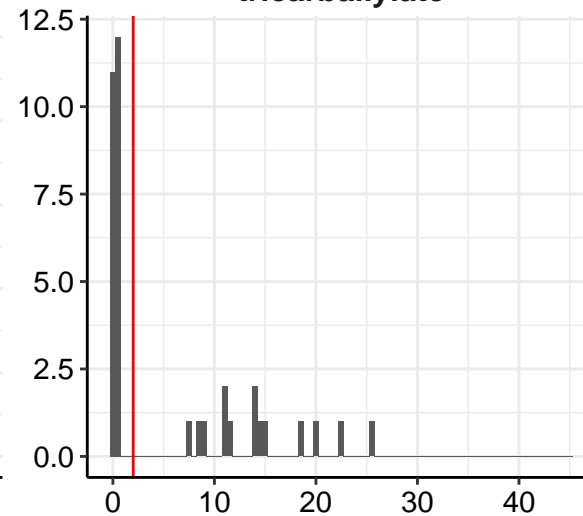**OD fold change**
